# Supplementary material for: C-reactive protein and lactate dehydrogenase serum levels potentially predict the response to checkpoint inhibitors in patients with advanced non-small cell lung cancer
Source: PubMed Central journal article supplement — J Thorac Dis. 2023 Apr 17;15(4):1892–900. doi: 10.21037/jtd-23-240 (PMC10183533; doi:10.21037/jtd-23-240), 2023-04-17
Supplement: jtd-15-04-1892-dss.pdf [file jtd-15-04-1892-dss.pdf]

## Data Sharing Statement

|                     |                                                                                                                                                     |                                                                                                                              |
|---------------------|-----------------------------------------------------------------------------------------------------------------------------------------------------|------------------------------------------------------------------------------------------------------------------------------|
| <b>Article Info</b> | <a href="https://dx.doi.org/10.21037/jtd-23-240">https://dx.doi.org/10.21037/jtd-23-240</a>                                                         |                                                                                                                              |
| <b>Item</b>         | <b>Question</b>                                                                                                                                     | <b>Authors' Response<br/>(place "-" if not applicable)</b>                                                                   |
| 1                   | Would you like to share data collected for your study to others?                                                                                    | Yes.                                                                                                                         |
| 2                   | If not, would you like to share the reason for your decision?                                                                                       | -                                                                                                                            |
| 3                   | What data in particular will be shared?                                                                                                             | The survival data will be shared                                                                                             |
| 4                   | Any other documents will be shared? Such as study protocol, statistical analysis plan, informed consent form, clinical study report, analytic code. | Statistical analysis plan will be shared if requested.                                                                       |
| 5                   | When will data availability begin?                                                                                                                  | From the publication date.                                                                                                   |
| 6                   | When will data availability end?                                                                                                                    | Two years within the publication date, since the technique or survival data may be updated over time.                        |
| 7                   | To whom will you share the data?                                                                                                                    | Medical oncologists, pulmonologist and thoracic surgeons who are interested in immunotherapy prognostic predictors for NSCLC |
| 8                   | For what type of analysis or purpose?                                                                                                               | For analysis to evaluate the effectiveness of CRP and LDH in predicting the prognosis of lung cancer immunotherapy           |
| 9                   | How or where can the data/documents be obtained?                                                                                                    | Emails could be sent to the address below to obtain the shared data: reimujiang@126.com                                      |
| 10                  | Any other restrictions?                                                                                                                             | We may balance the potential benefits and risks for each request and then provide the data that could be shared.             |
